# Supplementary material for: Identification and determination of ergot alkaloids in Morning Glory cultivars
Source: PubMed Central journal article supplement (PMC4830885; doi:10.1007/s00216-016-9322-5), 2016-02-12
Supplement: 216_2016_9322_MOESM1_ESM.pdf [file 216_2016_9322_MOESM1_ESM.pdf]

**Analytical and Bioanalytical Chemistry**

**Electronic Supplementary Material**

**Identification and determination of ergot alkaloids in Morning Glory cultivars**

Julia Nowak, Michał Woźniakiewicz, Piotr Klepacki, Anna Sowa, Paweł Kościelniak

**Table S1** Doehlert experimental design for optimization of UAE-B. Coded and experimental parameters values

| Coded experiment values |         |        |        | Experimental parameters values |              |            |
|-------------------------|---------|--------|--------|--------------------------------|--------------|------------|
| No. of experiment       | Factors |        |        | Factors                        |              |            |
|                         | A       | B      | C      | A<br>T (°C)                    | B<br>t (min) | C<br>MeOH% |
| 1                       | 0       | 0      | 0      | 50                             | 20           | 75         |
| 2                       | 1       | 0      | 0      | 60                             | 20           | 75         |
| 3                       | 0.5     | 0.866  | 0      | 55                             | 35           | 75         |
| 4                       | 0.5     | 0.289  | 0.817  | 55                             | 25           | 100        |
| 5                       | -1      | 0      | 0      | 40                             | 20           | 75         |
| 6                       | -0.5    | -0.866 | 0      | 45                             | 5            | 75         |
| 7                       | -0.5    | -0.289 | -0.817 | 45                             | 10           | 50         |
| 8                       | 0.5     | -0.866 | 0      | 55                             | 5            | 75         |
| 9                       | 0.5     | -0.289 | 0.817  | 55                             | 10           | 100        |
| 10                      | -0.5    | 0.866  | 0      | 45                             | 35           | 75         |
| 11                      | 0       | 0.577  | -0.817 | 50                             | 30           | 50         |
| 12                      | -0.5    | 0.289  | 0.817  | 45                             | 25           | 100        |
| 13                      | 0       | -0.577 | 0.817  | 50                             | 15           | 100        |

**Table S2** Doehlert experimental design for optimization of MAE. Coded and experimental parameters values

| Coded experiment values |         |        |        | Experimental parameters values |              |            |
|-------------------------|---------|--------|--------|--------------------------------|--------------|------------|
| No. of experiment       | Factors |        |        | Factors                        |              |            |
|                         | A       | B      | C      | A<br>T (°C)                    | B<br>t (min) | C<br>MeOH% |
| 1                       | 0       | 0      | 0      | 65                             | 20           | 75         |
| 2                       | 1       | 0      | 0      | 85                             | 20           | 75         |
| 3                       | 0.5     | 0.866  | 0      | 75                             | 35           | 75         |
| 4                       | 0.5     | 0.289  | 0.817  | 75                             | 25           | 100        |
| 5                       | -1      | 0      | 0      | 45                             | 20           | 75         |
| 6                       | -0.5    | -0.866 | 0      | 55                             | 5            | 75         |
| 7                       | -0.5    | -0.289 | -0.817 | 55                             | 10           | 50         |
| 8                       | 0.5     | -0.866 | 0      | 75                             | 5            | 75         |
| 9                       | 0.5     | -0.289 | 0.817  | 75                             | 10           | 100        |
| 10                      | -0.5    | 0.866  | 0      | 55                             | 35           | 75         |
| 11                      | 0       | 0.577  | -0.817 | 65                             | 30           | 50         |
| 12                      | -0.5    | 0.289  | 0.817  | 55                             | 25           | 100        |
| 13                      | 0       | -0.577 | 0.817  | 65                             | 15           | 100        |
